# Supplementary material for: Proximate grassland and shrub-encroached sites show dramatic restructuring of soil bacterial communities
Source: PeerJ. 2019 Jul 19;7:e7304. doi: 10.7717/peerj.7304 (PMC6644630; doi:10.7717/peerj.7304)
Supplement: Supplemental Information 1 [file peerj-07-7304-s001.xlsx]

## Sheet: env
	pH	Soil moisture	NH4+	NO3-	DOC	DON	TC	TN	TP	SIC	SOC
GG1	9.254	9.0893	1.33136	2.04142	46.4427	4.11243	0.901088	0.102838	0.310064	0.0696459	0.836257
GG2	9.09333	9.06979	1.50794	1.5377	38.7129	2.13294	0.829777	0.107504	0.26354	0.0267779	0.807036
GG3	9	9.81493	1.26733	1.38614	33.2024	2.60396	0.761173	0.0982392	0.233839	0.0243161	0.740687
GG4	8.714	8.84256	1.86	2.12	29.8211	2.77	0.649305	0.0834961	0.262187	0.0104262	0.641964
GG5	9.046	7.92626	1.91552	0.903733	46.507	3.85069	0.739438	0.0930808	0.244115	0.0241755	0.718507
GG6	8.378	5.94378	1.69941	1.66994	30.754	2.09234	0.625681	0.0790035	0.228069	0.0144302	0.613253
GG7	7.838	6.80151	1.20278	1.96819	34.6078	3.2505	0.677609	0.08473	0.234009	0.0134438	0.666636
GG8	7.768	7.12961	1.75248	0.584158	42.0432	3.56436	0.738415	0.0900356	0.247554	0.0154331	0.725788
GG9	7.27	7.20987	2.01389	0.843254	47.1569	3.1746	0.842751	0.105793	0.275286	0.0182132	0.828203
GG10	7.636	6.90058	2.16	0.58	54.2829	2.86	0.857324	0.106424	0.268422	0.0133655	0.848348
SS1	9.242	8.49212	4.3222	2.26916	58.7649	3.14342	0.895214	0.0926369	0.307656	0.0853792	0.81374
SS2	9.16	9.23629	1.7185	5.15748	62.5249	2.1063	1.03479	0.12099	0.285606	0.0434115	0.995777
SS3	8.96909	8.95363	1.9703	5.67327	70.5128	0.237624	0.8825	0.104083	0.276214	0.0191409	0.86749
SS4	8.76286	8.82519	1.44269	3.70553	40.3194	2.99407	0.775903	0.0937247	0.279652	0.0110853	0.768218
SS5	9.03455	7.84622	1.14625	6.14625	62.3752	2.36166	0.929494	0.101945	0.256435	0.0294825	0.9041
SS6	8.18091	6.3402	2.357	3.10651	43.7132	4.36884	0.943521	0.108151	0.263439	0.013526	0.933627
SS7	7.74	7.07207	1.08782	3.20359	75.3507	8.06387	1.03946	0.117142	0.28931	0.0119148	1.0315
SS8	7.882	6.92861	2.5	1.51786	61.2	7.18254	1.00123	0.109922	0.24191	0.0183478	0.987907
SS9	7.50778	8.75427	2.06759	2.08748	99.504	8.04175	1.44348	0.15345	0.353141	0.0204785	1.43071
SS10	7.702	7.43694	3.50688	1.47348	81.0651	7.31827	1.40671	0.15677	0.328501	0.0106241	1.40377
